# Supplementary material
Source: Springer Nature journal article supplement (https://www.springermedizin.de/resource/supplementary/13023_2012_489_MOESM2_ESM.pdf/9642356)

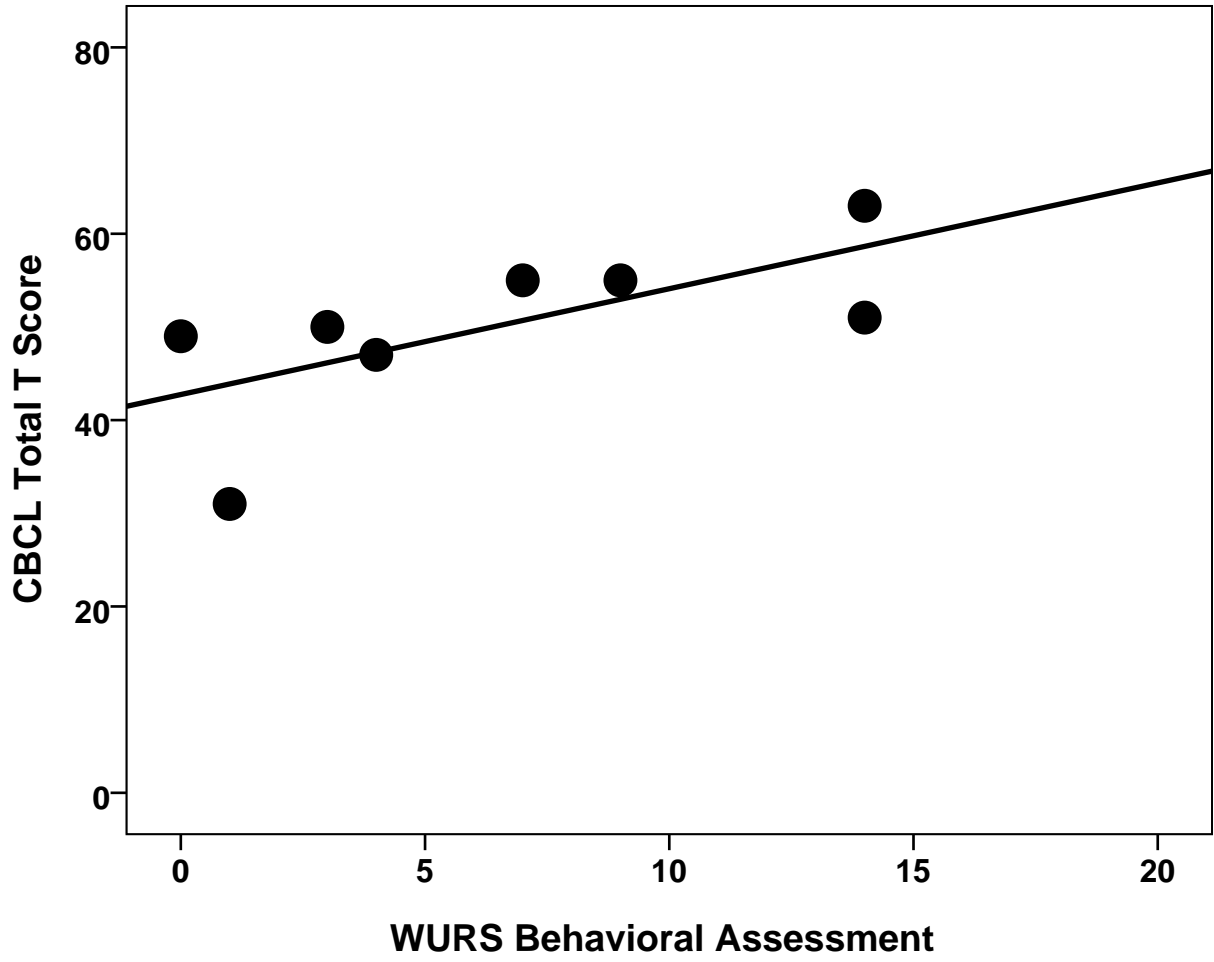

Supplement: MOESM2 [file 9642356]
